# Supplementary material for: Molecular Characterization of Bovine Leukemia Virus with the Evidence of a New Genotype Circulating in Cattle from Kazakhstan
Source: MDPI journal article supplement (doi:10.3390/pathogens11020180), 2022-01-28
Supplement: s1 [file s1]

**Table S2.** BLV genotype reference sequences

| No | Accession  | Genotype | No | Accession  | Genotype | No  | Accession  | Genotype |
|----|------------|----------|----|------------|----------|-----|------------|----------|
| 1  | KU233564.1 | G_1      | 47 | MG678759.1 | G_1      | 93  | HE967301.1 | G_1      |
| 2  | LC512446.1 | G_1      | 48 | LC361257.1 | G_1      | 94  | FM209472.1 | G_1      |
| 3  | LC512445.1 | G_1      | 49 | LC007988.1 | G_1      | 95  | MG678784.1 | G_1      |
| 4  | LC361266.1 | G_1      | 50 | LC007987.1 | G_1      | 96  | KP201473.1 | G_1      |
| 5  | MW926774.1 | G_1      | 51 | LC361261.1 | G_1      | 97  | KP201472.1 | G_1      |
| 6  | LC080651.1 | G_1      | 52 | LC007989.1 | G_1      | 98  | KP201471.1 | G_1      |
| 7  | LC007992.1 | G_1      | 53 | LC007981.1 | G_1      | 99  | FM209470.1 | G_1      |
| 8  | MW926773.1 | G_1      | 54 | LC007980.1 | G_1      | 100 | MW926784.1 | G_1      |
| 9  | MW926779.1 | G_1      | 55 | LC007985.1 | G_1      | 101 | MW926785.1 | G_1      |
| 10 | MW926775.1 | G_1      | 56 | LC361249.1 | G_1      | 102 | MW926777.1 | G_1      |
| 11 | MW926772.1 | G_1      | 57 | LC361250.1 | G_1      | 103 | HE967303.1 | G_1      |
| 12 | LC080653.1 | G_1      | 58 | LC361253.1 | G_1      | 104 | MW926780.1 | G_1      |
| 13 | LC007990.1 | G_1      | 59 | LC361248.1 | G_1      | 105 | MW926781.1 | G_1      |
| 14 | LC007983.1 | G_1      | 60 | LC361251.1 | G_1      | 106 | KP201470.1 | G_1      |
| 15 | LC361265.1 | G_1      | 61 | LC361252.1 | G_1      | 107 | KP201476.1 | G_1      |
| 13 | LC007991.1 | G_1      | 62 | LC361260.1 | G_1      | 108 | KP201475.1 | G_1      |
| 17 | LC080652.1 | G_1      | 63 | MG678775.1 | G_1      | 109 | KP201474.1 | G_1      |
| 18 | LC361264.1 | G_1      | 64 | MG678774.1 | G_1      | 110 | MG678769.1 | G_1      |
| 19 | MW926778.1 | G_1      | 65 | MG678770.1 | G_1      | 111 | MG678777.1 | G_1      |
| 20 | MW926782.1 | G_1      | 66 | MG678773.1 | G_1      | 112 | MG678778.1 | G_1      |
| 21 | MG678789.1 | G_1      | 67 | KP201481.1 | G_1      | 113 | MG678779.1 | G_1      |
| 22 | MH170027.1 | G_1      | 68 | KP201482.1 | G_1      | 114 | KP201469.1 | G_1      |
| 23 | FM209468.1 | G_1      | 69 | MG678768.1 | G_1      | 115 | KP201468.1 | G_1      |
| 24 | AB934282.1 | G_1      | 70 | MG678782.1 | G_1      | 116 | KP201467.1 | G_1      |
| 25 | MW926783.1 | G_1      | 71 | MG678783.1 | G_1      | 117 | KP201478.1 | G_1      |
| 26 | FM209469.1 | G_1      | 72 | MG678780.1 | G_1      | 118 | KP201477.1 | G_1      |
| 27 | MG678787.1 | G_1      | 73 | MG678781.1 | G_1      | 119 | KP201480.1 | G_1      |
| 28 | MN966692.1 | G_1      | 74 | MG678771.1 | G_1      | 120 | KP201479.1 | G_1      |
| 29 | MW926776.1 | G_1      | 75 | MG678772.1 | G_1      | 121 | FJ914764.1 | G_2      |
| 30 | MG678786.1 | G_1      | 76 | MG678776.1 | G_1      | 122 | LC080655.1 | G_2      |
| 31 | MH170028.1 | G_1      | 77 | MG678767.1 | G_1      | 123 | LC080654.1 | G_2      |
| 32 | MG678788.1 | G_1      | 78 | LC007977.1 | G_1      | 124 | AF399704.3 | G_2      |
| 33 | MG678785.1 | G_1      | 79 | LC007978.1 | G_1      | 125 | LC361267.1 | G_3      |
| 34 | LC361255.1 | G_1      | 80 | LC007979.1 | G_1      | 126 | MG678790.1 | G_3      |
| 35 | LC361256.1 | G_1      | 81 | KU233565.1 | G_1      | 127 | KP201465.1 | G_3      |
| 36 | MG678760.1 | G_1      | 82 | KU233557.1 | G_1      | 128 | LC361259.1 | G_3      |
| 37 | LC361254.1 | G_1      | 83 | KU233558.1 | G_1      | 129 | KP201464.1 | G_3      |
| 38 | LC361262.1 | G_1      | 84 | KU233559.1 | G_1      | 130 | JQ686096.1 | G_4      |
| 39 | LC361263.1 | G_1      | 85 | MG678766.1 | G_1      | 131 | JQ686098.1 | G_4      |
| 40 | LC361258.1 | G_1      | 86 | MG678765.1 | G_1      | 132 | JQ686093.1 | G_4      |
| 41 | LC512447.1 | G_1      | 87 | MG678764.1 | G_1      | 133 | MN966690.1 | G_4      |
| 42 | LC512448.1 | G_1      | 88 | LC005615.1 | G_1      | 134 | MN966691.1 | G_4      |
| 43 | MG678763.1 | G_1      | 89 | LC005616.1 | G_1      | 135 | JQ686090.1 | G_4      |
| 44 | KU233556.1 | G_1      | 90 | KU233566.1 | G_1      | 136 | MN966693.1 | G_4      |
| 45 | MG678761.1 | G_1      | 91 | KU233567.1 | G_1      | 137 | JQ686117.1 | G_4      |
| 46 | MG678762.1 | G_1      | 92 | HE967302.1 | G_1      | 138 | JQ686106.1 | G_4      |

|     |            |     |
|-----|------------|-----|
| 139 | JQ686107.1 | G_4 |
| 140 | JQ686112.1 | G_4 |
| 141 | JQ686095.1 | G_4 |
| 142 | JQ686094.1 | G_4 |
| 143 | JQ686111.1 | G_4 |
| 144 | JQ686089.1 | G_4 |
| 145 | MN966695.1 | G_4 |
| 146 | MK840879.1 | G_4 |
| 147 | JQ686091.1 | G_4 |
| 148 | MN966689.1 | G_4 |
| 149 | JQ686118.1 | G_4 |
| 150 | MN966694.1 | G_4 |
| 151 | MN966688.1 | G_4 |
| 152 | JQ675758.1 | G_4 |
| 153 | AF067081.1 | G_4 |
| 154 | AF503581.1 | G_4 |
| 155 | HM563774.3 | G_4 |
| 156 | JQ686092.1 | G_4 |
| 157 | MK840877.1 | G_4 |
| 158 | MK820044.1 | G_4 |
| 159 | EF065635.1 | G_5 |
| 160 | EF065639.1 | G_5 |
| 161 | EF065643.1 | G_5 |
| 162 | EF065645.1 | G_5 |
| 163 | EF065654.1 | G_5 |
| 164 | EF065655.1 | G_5 |
| 165 | MW926786.1 | G_6 |
| 166 | MW926789.1 | G_6 |
| 167 | LC080658.1 | G_6 |
| 168 | MW926792.1 | G_6 |
| 169 | MW926791.1 | G_6 |
| 170 | MW926794.1 | G_6 |
| 171 | MW926788.1 | G_6 |
| 172 | MW926787.1 | G_6 |
| 173 | MW926793.1 | G_6 |
| 174 | LC080657.1 | G_6 |
| 175 | MK840880.1 | G_6 |
| 176 | LC080656.1 | G_6 |
| 177 | MK840878.1 | G_6 |
| 178 | KU233563.1 | G_6 |
| 179 | MK840876.1 | G_6 |
| 180 | MK840875.1 | G_6 |
| 181 | KU233562.1 | G_6 |
| 182 | MH341525.1 | G_6 |
| 183 | MH341521.1 | G_6 |
| 184 | MH341524.1 | G_6 |

|     |            |     |
|-----|------------|-----|
| 185 | MH341516.1 | G_6 |
| 186 | MH341522.1 | G_6 |
| 187 | MH341523.1 | G_6 |
| 188 | MH341520.1 | G_6 |
| 189 | MH341519.1 | G_6 |
| 190 | MH341518.1 | G_6 |
| 191 | MH341517.1 | G_6 |
| 192 | LC512450.1 | G_6 |
| 193 | MH170030.1 | G_6 |
| 194 | MW926790.1 | G_6 |
| 195 | LC512449.1 | G_6 |
| 196 | MH170029.1 | G_6 |
| 197 | LC512451.1 | G_6 |
| 198 | KU233548.1 | G_6 |
| 199 | KU233549.1 | G_6 |
| 200 | KU233544.1 | G_6 |
| 201 | KF801470.2 | G_7 |
| 202 | KF801469.2 | G_7 |
| 203 | KF801467.2 | G_7 |
| 204 | HM563758.3 | G_7 |
| 205 | KF801468.2 | G_7 |
| 206 | HM563749.3 | G_7 |
| 207 | JQ675756.1 | G_7 |
| 208 | JQ675757.1 | G_7 |
| 209 | KF801466.2 | G_7 |
| 210 | JQ686120.1 | G_7 |
| 211 | JQ686116.1 | G_7 |
| 212 | JQ686119.1 | G_7 |
| 213 | JQ675760.1 | G_8 |
| 214 | JQ675759.1 | G_8 |
| 215 | HM563764.3 | G_8 |
| 216 | LC080663.1 | G_9 |
| 217 | LC080662.1 | G_9 |
| 218 | LC080659.1 | G_9 |
| 219 | LC080664.1 | G_9 |
| 220 | LC080674.1 | G_9 |
| 221 | LC080668.1 | G_9 |
| 222 | LC080666.1 | G_9 |
| 223 | LC080675.1 | G_9 |
| 224 | LC080660.1 | G_9 |
| 225 | LC080667.1 | G_9 |
| 226 | LC080673.1 | G_9 |
| 227 | LC080670.1 | G_9 |
| 228 | LC080669.1 | G_9 |
| 229 | LC080665.1 | G_9 |
| 230 | LC080661.1 | G_9 |

|     |            |      |
|-----|------------|------|
| 231 | LC080672.1 | G_9  |
| 232 | LC080671.1 | G_9  |
| 233 | KU233554.1 | G_10 |
| 234 | LC154064.1 | G_10 |
| 235 | KU233551.1 | G_10 |
| 236 | KU233555.1 | G_10 |
| 237 | LC154066.1 | G_10 |
| 238 | LC154065.1 | G_10 |
| 239 | LC154067.1 | G_10 |
| 240 | LC154848.1 | G_10 |
| 241 | LC512452.1 | G_10 |
| 242 | KU233545.1 | G_10 |
| 243 | KU233543.1 | G_10 |
| 244 | KU233552.1 | G_10 |
| 245 | KU233553.1 | G_10 |
| 246 | KU233550.1 | G_10 |
| 247 | LC154847.1 | G_10 |
| 248 | KU233549.1 | G_10 |
| 249 | KU233546.1 | G_10 |
| 250 | KU233561.1 | G_10 |
| 251 | 7S_BKO     | G_12 |
| 252 | 14D_BKO    | G_12 |
| 253 | 15D_BKO    | G_12 |
| 254 | 9S_BKO     | G_12 |
