# Supplementary material for: Molecular Characterization of Bovine Leukemia Virus with the Evidence of a New Genotype Circulating in Cattle from Kazakhstan
Source: MDPI journal article supplement (doi:10.3390/pathogens11020180), 2022-01-28
Supplement: s1 [file s1]

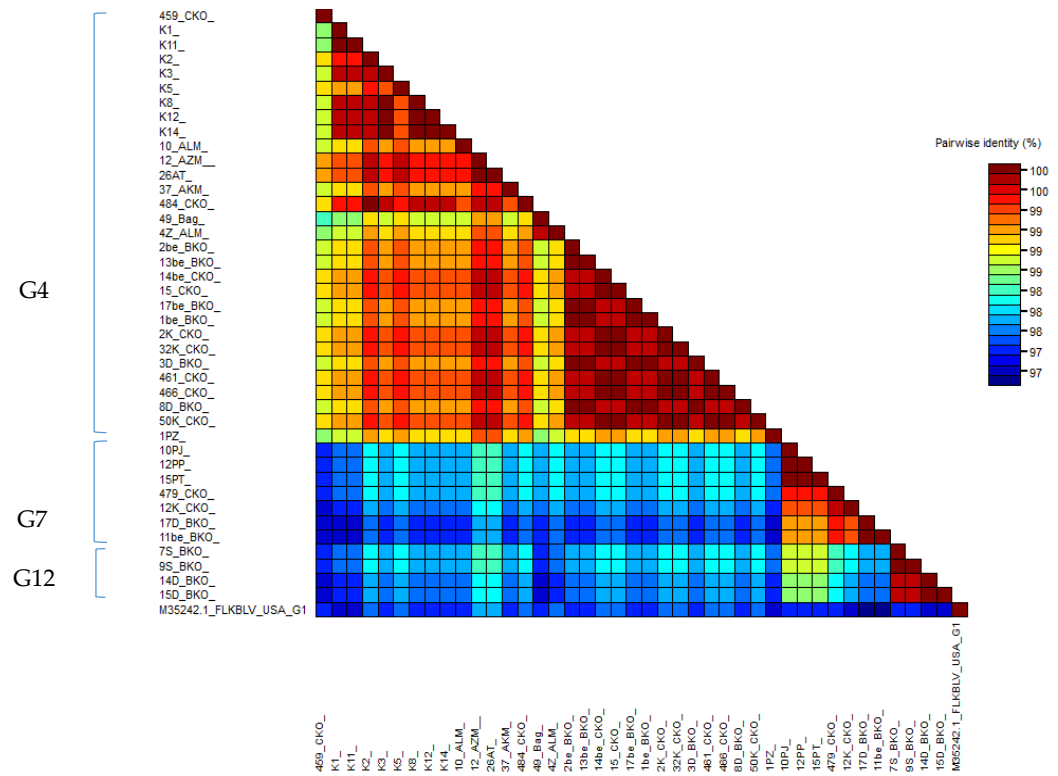

**Figure S2.** SDT colour-coded matrix of pairwise identity scores generated by the alignment of a G4, G7 and G12 400 bp long BLV *env* gene set of nucleotide sequences for 41 Kazakh BLV isolates and FLK-BLV strain
