# Supplementary material for: Molecular Characterization of Bovine Leukemia Virus with the Evidence of a New Genotype Circulating in Cattle from Kazakhstan
Source: MDPI journal article supplement (doi:10.3390/pathogens11020180), 2022-01-28
Supplement: s1 [file s1]

| Number      | Genotype | 7         | 12     | 15     | 24 | 28         | 29               | 32     | 33 | 37     | 48     | 56          | 58     | 73             | 74 | 80     | 82          | 106    | 121       | 132    | 133    | 134     | 137         | 140                     | 141    | 143         | 144       | 177 | 189    | 252         | 264 | 267 | 290    | 291       | 301        |  |
|-------------|----------|-----------|--------|--------|----|------------|------------------|--------|----|--------|--------|-------------|--------|----------------|----|--------|-------------|--------|-----------|--------|--------|---------|-------------|-------------------------|--------|-------------|-----------|-----|--------|-------------|-----|-----|--------|-----------|------------|--|
| 4           | 1<br>2   | S         | Q      | I      | L  | C          | Q                | Q      | A  | S      | T      | S           | S      | A              | R  | L      | F           | V      | R         | Q      | A      | D       | S           | I                       | N      | Q           | I         | P   | S      | T           | P   | R   | T      | A         | R          |  |
| 1<br>8      | 1<br>0   |           |        |        |    |            |                  |        | T  |        |        |             |        |                |    |        |             | A      | 6H        |        |        |         | 1<br>7<br>F | V                       | 1<br>S | 1<br>3<br>R | T         | S   |        |             |     |     |        |           | 11P        |  |
| 1<br>7      | 9        |           |        |        |    |            |                  |        | T  |        | A      |             |        |                | K  |        | 1<br>2<br>L |        |           |        | V      |         | V           |                         |        |             |           |     |        |             |     |     |        |           |            |  |
| 3           | 8        |           |        |        |    |            | P                |        | T  |        | A      |             |        |                | K  |        |             |        |           |        |        |         | V           |                         |        |             |           |     |        |             |     | K   |        |           |            |  |
| 1<br>2      | 7        | 6P<br>/1F |        |        |    |            |                  | 4<br>R | T  |        | 5<br>I |             |        |                |    |        |             |        |           |        |        |         |             | 11<br>V/<br>1I          |        |             |           |     |        |             |     |     |        |           | V          |  |
| 3<br>6      | 6        | 1P        | E      |        |    |            |                  |        | T  |        |        |             |        |                |    |        |             |        |           |        |        |         | V           | 1<br>D                  |        | T           |           |     | 7<br>N | 1<br>0<br>A |     | K   |        | 2V        | 10P        |  |
| 6           | 5        |           |        | V      | V  |            | 2<br>R           |        | T  | 4<br>T |        |             |        |                |    | S      |             | 1<br>I |           | R      | 1<br>T |         |             | V                       |        |             |           |     |        |             |     |     | 5<br>M | 5T        |            |  |
| 2<br>9      | 4        |           |        |        |    |            |                  |        | T  |        |        | 1<br>3<br>F | 6<br>A | 1L<br>/28<br>P |    | 1<br>S |             |        | 27<br>H   | 7<br>R | 1<br>P |         |             | V                       |        |             | 13<br>T   |     |        |             |     |     |        |           |            |  |
| 5           | 3        |           |        |        |    |            |                  |        | T  |        |        |             |        |                | K  | 2<br>M |             |        |           |        | T      |         |             | V                       | D      |             |           |     |        |             |     |     |        |           |            |  |
| 4           | 2        |           |        |        |    |            |                  |        | T  |        |        |             |        |                | K  |        |             |        |           |        |        |         |             | V                       | D      |             |           |     |        |             |     |     |        |           |            |  |
| 1<br>2<br>0 | 1        | 1P        | 2<br>P | 2<br>T |    | 1F/<br>42S | 1<br>1<br>9<br>R |        | T  |        |        |             |        |                | K  |        | S           | 4<br>A | 2H<br>/1L | 1<br>R | 1<br>T | 11<br>N | 1<br>A      | 5<br>A/<br>11<br>5<br>V |        | 1<br>H      | 1T/<br>2N |     | 9<br>R | 1<br>P      | S   |     |        | 2V<br>/1T | 12P<br>/1G |  |

**Table S4** Amino acid substitutions in BLV ENV glycoprotein of Kazakhstan genotype G12 sequences and 250 sequences representative for G1-G10 genotypes. Kazakhstan BLV sequences clustered as genotype G4 and G7 were not included in the analysis. Particular parsimony informative sites were selected based on the occurrence of amino acid substitution characteristic for genotype/genotypes. The number next to the amino acids in each position indicates the number of given substitution in that genotypes. The presence of one amino acid indicates that it was present in 100% of the sequences of the genotype. Blank spaces - amino acid identical to genotype G12.
