# Supplementary material for: Molecular Characterization of Bovine Leukemia Virus with the Evidence of a New Genotype Circulating in Cattle from Kazakhstan
Source: MDPI journal article supplement (doi:10.3390/pathogens11020180), 2022-01-28
Supplement: s1 [file s1]

**Table S1.** Identity and origin of the sequences analysed in the study.

| <b>GenBank<br/>Accession No<sup>1</sup></b> | <b>Name/Geographic origin</b>        | <b>Genotype</b> | <b>Reference</b> |
|---------------------------------------------|--------------------------------------|-----------------|------------------|
| OK631885                                    | 1PZ/Pavlodar                         | 4               | This paper       |
| OK631886                                    | 10PJ/Pavlodar                        | 7               | This paper       |
| OK631887                                    | 12PP/Pavlodar                        | 7               | This paper       |
| OK631888                                    | 15PK/Pavlodar                        | 7               | This paper       |
| OK945955                                    | K1/Kostanay                          | 4               | This paper       |
| OK945956                                    | K2/Kostanay                          | 4               | This paper       |
| OK945957                                    | K3/Kostanay                          | 4               | This paper       |
| OK945958                                    | K5/Kostanay                          | 4               | This paper       |
| OK945959                                    | K8/Kostanay                          | 4               | This paper       |
| OK945960                                    | K11/Kostanay                         | 4               | This paper       |
| OK945961                                    | K12/Kostanay                         | 4               | This paper       |
| OK945962                                    | K14/Kostanay                         | 4               | This paper       |
| OK945963                                    | 15_CKO/North Kazakhstan              | 4               | This paper       |
| OK945964                                    | 14be_CKO/ North Kazakhstan           | 4               | This paper       |
| OK945965                                    | 461_CKO/North Kazakhstan             | 4               | This paper       |
| OK945966                                    | 466_CKO/North Kazakhstan             | 4               | This paper       |
| OK945967                                    | 479_CKO/North Kazakhstan             | 7               | This paper       |
| OK945968                                    | 484_CKO/North Kazakhstan             | 4               | This paper       |
| OK945969                                    | 2K_CKO/North Kazakhstan              | 4               | This paper       |
| OK945970                                    | 12K_CKO/North Kazakhstan             | 7               | This paper       |
| OK945971                                    | 32K_CKO/North Kazakhstan             | 4               | This paper       |
| OK945972                                    | 50K_CKO/North Kazakhstan             | 4               | This paper       |
| OK945973                                    | 49_Bag/Bagration/East Kazakhstan     | 4               | This paper       |
| OK945974                                    | 7S_BKO/ Sredigornoje/East Kazakhstan | 12              | This paper       |
| OK945975                                    | 9S_BKO/ Sredigornoje/East Kazakhstan | 12              | This paper       |
| OK945976                                    | 14D_BKO/ Dorodnica/East Kazakhstan   | 12              | This paper       |
| OK945977                                    | 15D_BKO/ Dorodnica/East Kazakhstan   | 12              | This paper       |
| OK945978                                    | 3D_BKO/ Dorodnica/East Kazakhstan    | 4               | This paper       |
| OK945979                                    | 8D_BKO/ Dorodnica/East Kazakhstan    | 4               | This paper       |
| OK945980                                    | 17D_BKO/Dorodnica/ East Kazakhstan   | 7               | This paper       |
| OK945981                                    | 1be_BKO/ East Kazakhstan             | 4               | This paper       |
| OK945982                                    | 2be_BKO/ East Kazakhstan             | 4               | This paper       |
| OK945983                                    | 11be_BKO/ East Kazakhstan            | 7               | This paper       |
| OK945984                                    | 13be_BKO/ East Kazakhstan            | 4               | This paper       |
| OK945985                                    | 17be_BKO/ East Kazakhstan            | 4               | This paper       |
| OK945986                                    | 12_AZM/Almaty                        | 4               | This paper       |
| OK945987                                    | 10_ALM/Almaty                        | 4               | This paper       |
| OK945988                                    | 4Z_ALM/Almaty                        | 4               | This paper       |
| OK945989                                    | 26_AT/Almaty                         | 4               | This paper       |
| OK945990                                    | 37_AKM/Almaty                        | 4               | This paper       |
| OK945991                                    | 459_CKO/North Kazakhstan             | 4               | This paper       |
| M35242.1                                    | FLKBLV/USA                           | 1               | [1]              |
| D00647.1                                    | pBLV-A1/Australia                    | 1               | [2]              |
| LC080654.1                                  | lima40/Peru                          | 2               | [3]              |
| AF257515.1                                  | Argentina                            | 2               | [4]              |

|            |                          |    |                                      |
|------------|--------------------------|----|--------------------------------------|
| KP201465.1 | GBGS-12/South_Korea      | 3  | [5]                                  |
| EF065648.1 | USCA-2/USA               | 3  | [6]                                  |
| M35238.1   | LB59/France              | 4  | [1]                                  |
| KF801459.2 | 8MD/Moldova              | 4  | [7]                                  |
| EU262575.1 | 301_PL/Poland            | 4  | [8]                                  |
| HM563774.1 | 68_PL/Poland             | 4  | [8]                                  |
| M35240.1   | LB285/Belgium            | 4  | [1]                                  |
| LC498580   | DZ1.4/Egypt              | 4  | [9]                                  |
| MN966688.1 | K1170/South Africa       | 4  | [10]                                 |
| LC060794.1 | BLV_Mongolia-3/Mongolia  | 4  | [11]                                 |
| LC060795.1 | BLV_Mongolia-4/Mongolia  | 4  | [11]                                 |
| HQ902258.1 | 1_BY/Belarus             | 4  | [8]                                  |
| MG204552.1 | IR-Esfahan/Iran          | 4  | [12]                                 |
| HM563781   | 4_2_UA/Ukraine           | 4  | [8]                                  |
| AY515273   | 96/Chile                 | 4  | [13]                                 |
| AF033818   | USA                      | 4  | Direct submission by Chappey (1997)  |
| FJ808596.1 | LS-SFB/Argentina         | 4  | [14]                                 |
| LC193462.1 | BLV-Zambia01-2016/Zambia | 4  | [15]                                 |
| MK820044.1 | B3008/China              | 4  | [16]                                 |
| U87872.1   | 3/Germany                | 4  | [17]                                 |
| EF065643.1 | CRLV/Costa_Rica          | 5  | [6]                                  |
| EF065645.1 | CRAG-1/Costa_Rica        | 5  | [6]                                  |
| AY185360.2 | 151/Brazil               | 6  | [18]                                 |
| LC080656   | par62/Paraguay           | 6  | [3]                                  |
| AY515274.1 | 14/Chile                 | 7  | [13]                                 |
| HM563761   | 3_1_UA/Ukraine           | 7  | [8]                                  |
| HM563749   | 5_RU/Russia              | 7  | [8]                                  |
| EU262555.1 | 151_PL/Poland            | 7  | [8]                                  |
| JN695879.1 | 9V/Russia,Vologda        | 7  | Direct submission by Lomakina (2014) |
| JQ686119.1 | NK13/Russia,Novosibirsk  | 7  | Direct submission by Lomakina (2013) |
| S83530.1   | I2/Italy                 | 7  | [19]                                 |
| LC060801.1 | BLV_Mongolia-10/Mongolia | 7  | [11]                                 |
| KF801467   | 1MD/Moldova              | 7  | [7]                                  |
| KF801464   | 14MD/Moldova             | 7  | [7]                                  |
| HM563764.3 | 4-6/Ukraine              | 8  | [8]                                  |
| JQ675760.1 | pr72/Russia              | 8  | Direct submission by Lomakina (2013) |
| LC080668.1 | por28/Bolivia            | 9  | [3]                                  |
| LC080659.1 | mon1/Bolivia             | 9  | [3]                                  |
| KU233561.1 | Thai_Saraburi_I_Thailand | 10 | [20]                                 |
| LC154064.1 | L2/ Myanmar              | 10 | [21]                                 |
| KU764746.1 | E101/China               | 11 | [22]                                 |
| KU764747.1 | E102/China               | 11 | [22]                                 |

#### References:

1. Mamoun, R.Z.; Morisson, M.; Rebeyrotte, N.; Busetta, B.; Couez, D.; Kettmann, R.; Hospital, M.; Guillemain, B. Sequence variability of bovine leukemia virus env gene and its relevance to the

- structure and antigenicity of the glycoproteins. *J. Virol.* **1990**, *64*, 4180–4188, doi:10.1128/jvi.64.9.4180-4188.1990.
2. Coulston, J.; Naif, H.; Brandon, R.; Kumar, S.; Khan, S.; Daniel, R.C.W.; Lavin, M.F. Molecular Cloning and Sequencing of an Australian Isolate of Proviral Bovine Leukaemia Virus DNA: Comparison with other Isolates. *J. Gen. Virol.* **1990**, *71*, 1737–1746, doi:10.1099/0022-1317-71-8-1737.
3. Polat, M.; Takeshima, S.; Hosomichi, K.; Kim, J.; Miyasaka, T.; Yamada, K.; Arainga, M.; Murakami, T.; Matsumoto, Y.; de la Barra Diaz, V.; et al. A new genotype of bovine leukemia virus in South America identified by NGS-based whole genome sequencing and molecular evolutionary genetic analysis. *Retrovirology* **2016**, *13*, 4, doi:10.1186/s12977-016-0239-z.
4. Dube, S.; Dolcini, G.; Abbott, L.; Mehta, S.; Dube, D.; Gutierrez, S.; Ceriani, C.; Esteban, E.; Ferrer, J.; Poiesz, B. The Complete Genomic Sequence of a BLV Strain from a Holstein Cow from Argentina. *Virology* **2000**, *277*, 379–386, doi:10.1006/viro.2000.0622.
5. Lee, E.; Kim, E.-J.; Joung, H.-K.; Kim, B.-H.; Song, J.-Y.; Cho, I.-S.; Lee, K.-K.; Shin, Y.-K. Sequencing and phylogenetic analysis of the gp51 gene from Korean bovine leukemia virus isolates. *Virol. J.* **2015**, *12*, 64, doi:10.1186/s12985-015-0286-4.
6. Zhao, X.; Buehring, G.C. Natural genetic variations in bovine leukemia virus envelope gene: Possible effects of selection and escape. *Virology* **2007**, *366*, 150–165, doi:10.1016/j.virol.2007.03.058.
7. Pluta, A.; Rola-Łuszczak, M.; Kubiś, P.; Balov, S.; Moskalik, R.; Choudhury, B.; Kuźmak, J. Molecular characterization of bovine leukemia virus from Moldovan dairy cattle. *Arch. Virol.* **2017**, *162*, 1563–1576, doi:10.1007/s00705-017-3241-4.
8. Rola-Łuszczak, M.; Pluta, A.; Olech, M.; Donnik, I.; Petropavlovskiy, M. The Molecular Characterization of Bovine Leukaemia Virus Isolates from Eastern Europe and Siberia and Its Impact on Phylogeny. *PLoS One* **2013**, *8*, 58705, doi:10.1371/journal.pone.0058705.
9. Hamada, R.; Metwally, S.; Polat, M.; Borjigin, L.; Ali, A.O.; Abdel-Hady, A.A.A.; Mohamed, A.E.A.; Wada, S.; Aida, Y. Detection and Molecular Characterization of Bovine Leukemia Virus in Egyptian Dairy Cattle. *Front. Vet. Sci.* **2020**, *7*, doi:10.3389/fvets.2020.00608.
10. Suzuki, A.; Chapman, R.; Douglass, N.; Carulei, O.; van Rensburg, J.; Williamson, A.-L. Phylogenetic Analysis of South African Bovine Leukaemia Virus (BLV) Isolates. *Viruses* **2020**, *12*, 898, doi:10.3390/v12080898.
11. Ochirkhuu, N.; Konnai, S.; Odbileg, R.; Nishimori, A.; Okagawa, T.; Murata, S.; Ohashi, K. Detection of bovine leukemia virus and identification of its genotype in Mongolian cattle. *Arch. Virol.* **2016**, *161*, 985–991, doi:10.1007/s00705-015-2676-8.
12. Kazemimanesh, M.; Madadgar, O.; Steinbach, F.; Choudhury, B.; Azadmanesh, K. Detection and molecular characterization of bovine leukemia virus in various regions of Iran. *J. Gen. Virol.* **2019**, *100*, 1315–1327, doi:10.1099/jgv.0.001303.
13. Felmer, R.; Muñoz, G.; Zúñiga, J.; Recabal, M. Molecular analysis of a 444bp fragment of the bovine leukaemia virus gp51 env gene reveals a high frequency of non-silent point mutations and suggests the presence of two subgroups of BLV in Chile. *Vet. Microbiol.* **2005**, *108*, 39–47, doi:10.1016/j.vetmic.2005.04.005.
14. Rodriguez, S.M.; Golemba, M.D.; Campos, R.H.; Trono, K.; Jones, L.R. Bovine leukemia virus can be classified into seven genotypes: evidence for the existence of two novel clades. *J. Gen. Virol.* **2009**, *90*, 2788–2797, doi:10.1099/vir.0.011791-0.
15. Pandey, G.S.; Simulundu, E.; Mwiinga, D.; Samui, K.L.; Mweene, A.S.; Kajihara, M.; Mangani, A.; Mwenda, R.; Ndebe, J.; Konnai, S.; et al. Clinical and subclinical bovine leukemia virus infection in a dairy cattle herd in Zambia. *Arch. Virol.* **2017**, *162*, 1051–1056, doi:10.1007/s00705-016-3205-0.
16. Yang, Y.; Chen, L.; Dong, M.; Huang, W.; Hao, X.; Peng, Y.; Gong, Z.; Qin, A.; Shang, S.; Yang, Z. Molecular characterization of bovine leukemia virus reveals existence of genotype 4 in Chinese dairy cattle. *Virol. J.* **2019**, *16*, 108, doi:10.1186/s12985-019-1207-8.

17. Fechner, H.; Blankenstein, P.; Looman, A.C.; Elwert, J.; Geue, L.; Albrecht, C.; Kurg, A.; Beier, D.; Marquardt, O.; Ebner, D. Provirus Variants of the Bovine Leukemia Virus and Their Relation to the Serological Status of Naturally Infected Cattle. *Virology* **1997**, *237*, 261–269, doi:10.1006/viro.1997.8784.
18. Camargos, M.F.; Pereda, A.; Stancek, D.; Rocha, M.A.; Reis, J.K.P. dos; Greiser-Wilke, I.; Leite, R.C. Molecular characterization of the env gene from Brazilian field isolates of Bovine Leukemia Virus. *Virus Genes* **2007**, *34*, 343–350, doi:10.1007/s11262-006-0011-x.
19. Molteni, E.; Agresti, A.; Meneveri, R.; Marozzi, A.; Malcovati, M.; Bonizzi, L.; Poli, G.; Ginelli, E. Molecular Characterization of a Variant of Proviral Bovine Leukaemia Virus (BLV). *J. Vet. Med. Ser. B* **1996**, *43*, 201–211, doi:10.1111/j.1439-0450.1996.tb00307.x.
20. Lee, E.; Kim, E.-J.; Ratthanophart, J.; Vitoonpong, R.; Kim, B.-H.; Cho, I.-S.; Song, J.-Y.; Lee, K.-K.; Shin, Y.-K. Molecular epidemiological and serological studies of bovine leukemia virus (BLV) infection in Thailand cattle. *Infect. Genet. Evol.* **2016**, *41*, 245–254, doi:10.1016/j.meegid.2016.04.010.
21. Polat, M.; Moe, H.H.; Shimogiri, T.; Moe, K.K.; Takeshima, S.; Aida, Y. The molecular epidemiological study of bovine leukemia virus infection in Myanmar cattle. *Arch. Virol.* **2017**, *162*, 425–437, doi:10.1007/s00705-016-3118-y.
22. Yu, C.; Wang, X.; Zhou, Y.; Wang, Y.; Zhang, X.; Zheng, Y. Genotyping bovine leukemia virus in dairy cattle of Heilongjiang, northeastern China. *BMC Vet. Res.* **2019**, *15*, 179, doi:10.1186/s12917-019-1863-3.
