# Supplementary material for: Molecular Characterization of Bovine Leukemia Virus with the Evidence of a New Genotype Circulating in Cattle from Kazakhstan
Source: MDPI journal article supplement (doi:10.3390/pathogens11020180), 2022-01-28
Supplement: s1 [file s1]

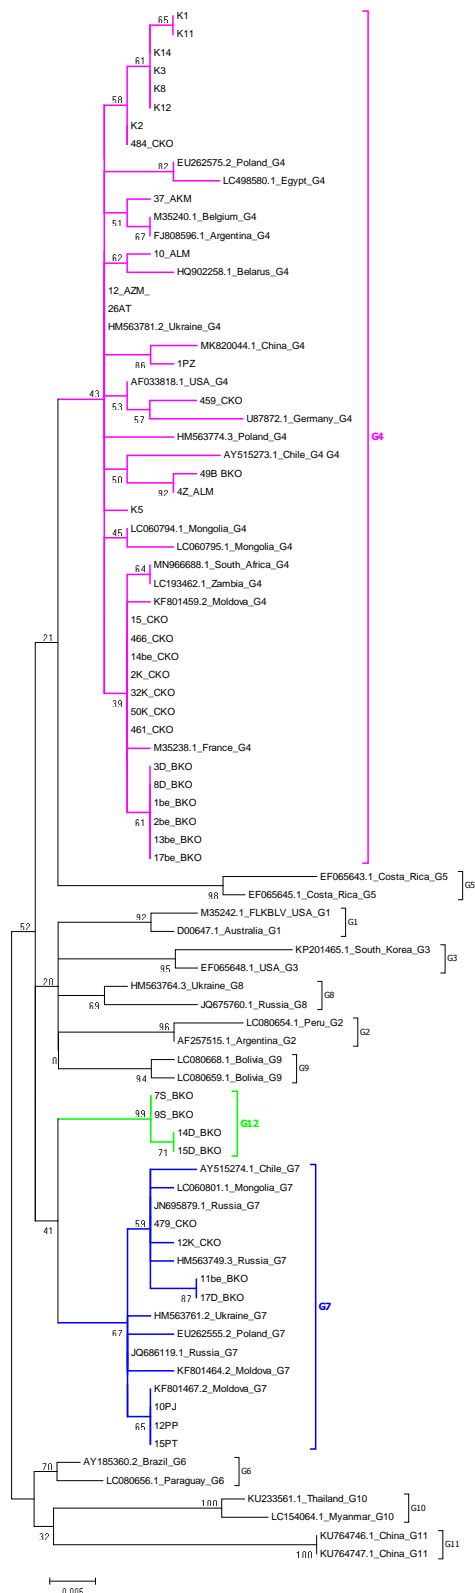

**Figure S1.** Phylogenetic analysis by the maximum likelihood method of a 400 bp fragment of *env* gene nucleotide sequences of Kazakhstan BLV isolates and known 11 BLV genotypes. The evolutionary history was inferred by using the Maximum Likelihood method based on the Kimura 2-parameter model. There were a total of 400 positions in the final dataset. Evolutionary analyses were conducted in MEGA6.
